# Supplementary material for: Contextual Factors Associated With County-Level Suicide Rates in the United States, 1999 to 2016
Source: PubMed Central journal article supplement (PMC6735416; doi:10.1001/jamanetworkopen.2019.10936), 2019-09-06
Supplement: jamanetwopen-2-e1910936-s001.pdf [file jamanetwopen-2-e1910936-s001.pdf]

## Supplementary Online Content

Steelesmith DL, Fontanella CA, Campo JV, Bridge JA, Warren KL, Root ED. Contextual factors associated with county-level suicide rates in the United States, 1999 to 2016. *JAMA Netw Open*. 2019;2(9):e1910936. doi:10.1001/jamanetworkopen.2019.10936

**eTable 1.** Counties Combined Owing to Boundary Changes

**eTable 2.** Rural-Urban Continuum Codes (RUCCs) Description and County Count for 2003 and 2013

**eTable 3.** Description, Year, and Source for Contextual Variables

**eTable 4.** Median and Interquartile Range of County-Level Suicide Rates Over Time by Rural-Urban Continuum

**eTable 5.** Summary of Contextual Variables by Time Period, Reported by County

**eTable 6.** Longitudinal Random-Effects Models of Associations of Contextual Variables With Suicide Rates by Method From 1999 to 2016

**eMethods.** Index Creation

**eReferences.**

This supplementary material has been provided by the authors to give readers additional information about their work.

**eTable 1. Counties Combined Owing to Boundary Changes**

| <b>State</b> | <b>County FIPS</b>                           | <b>Year of Boundary Changes</b> |
|--------------|----------------------------------------------|---------------------------------|
| Alaska       |                                              |                                 |
|              | 02130, 02195, 02198, 02201, 02275, and 02280 | 2008                            |
|              | 02230, 02105, and 02232                      | 2007                            |
| Virginia     |                                              |                                 |
|              | 51515 and 51019                              | 2013                            |
|              | 51005 and 51560                              | 2001                            |

**eTable 2. Rural-Urban Continuum Codes (RUCCs) Description and County Count for 2003 and 2013**

| Collapsed          | Code | Description                                                                        | 2003 Number of Counties | 2013 Number of Counties |
|--------------------|------|------------------------------------------------------------------------------------|-------------------------|-------------------------|
| <b>Metro</b>       |      |                                                                                    |                         |                         |
| Large Metropolitan | 1    | Counties in metro areas of 1 million population or more                            | 413                     | 432                     |
| Small Metropolitan | 2    | Counties in metro areas of 250,000 to 1 million population                         | 325                     | 379                     |
|                    | 3    | Counties in metro areas of fewer than 250,000 population                           | 351                     | 356                     |
| <b>Non-metro</b>   |      |                                                                                    |                         |                         |
| Micropolitan       | 4    | Urban population of 20,000 or more, adjacent to a metro area                       | 218                     | 214                     |
|                    | 5    | Urban population of 20,000 or more, not adjacent to a metro area                   | 105                     | 92                      |
|                    | 6    | Urban population of 2,500 to 19,999, adjacent to a metro area                      | 609                     | 593                     |
|                    | 7    | Urban population of 2,500 to 19,999, not adjacent to a metro area                  | 450                     | 433                     |
| Rural              | 8    | Completely rural or less than 2,500 urban population, adjacent to a metro area     | 235                     | 220                     |
|                    | 9    | Completely rural or less than 2,500 urban population, not adjacent to a metro area | 435                     | 424                     |

**eTable 3. Description, Year, and Source for Contextual Variables**

| Category                                                                                                         | Variable                                                   | Year                                             | Source                   |
|------------------------------------------------------------------------------------------------------------------|------------------------------------------------------------|--------------------------------------------------|--------------------------|
| <b>Socioeconomic Deprivation</b><br>(22 variables combined into single index using principal component analysis) |                                                            |                                                  |                          |
| Education                                                                                                        |                                                            |                                                  |                          |
|                                                                                                                  | Population aged 25+ with < 9 years of education, %         | 2000, 2005-2009, 2007-2011, 2010-2014, 2013-2017 | Census, 5-year ACS       |
|                                                                                                                  | Population aged 25+ with at least a high school diploma, % | 2000, 2005-2009, 2007-2011, 2010-2014, 2013-2017 | Census, 5-year ACS       |
| Occupation and employment                                                                                        |                                                            |                                                  |                          |
|                                                                                                                  | Employed persons aged 16+ in white collar occupations, %   | 2000, 2005-2009, 2007-2011, 2010-2014, 2013-2017 | Census, 5-year ACS       |
|                                                                                                                  | Civilian labor force population aged 16+ unemployed, %     | 2000, 2005-2009, 2007-2011, 2010-2014, 2013-2017 | Census, 5-year ACS, AHRF |
| Income                                                                                                           |                                                            |                                                  |                          |
|                                                                                                                  | Median family income, \$                                   | 2000, 2005-2009, 2007-2011, 2010-2014, 2013-2017 | Census, 5-year ACS, AHRF |
|                                                                                                                  | Gini coefficient                                           | 2000, 2005-2009, 2007-2011, 2010-2014, 2013-2017 | 5-year ACS               |
|                                                                                                                  | Median home value, \$                                      | 2000, 2005-2009, 2007-2011, 2010-2014, 2013-2017 | Census, 5-year ACS       |
|                                                                                                                  | Median gross rent, \$                                      | 2000, 2005-2009, 2007-2011, 2010-2014, 2013-2017 | Census, 5-year ACS       |
|                                                                                                                  | Median monthly mortgage, \$                                | 2000, 2005-2009, 2007-2011, 2010-2014, 2013-2017 | Census, 5-year ACS       |
|                                                                                                                  | Median annual real estate taxes, \$                        | 2000, 2005-2009, 2007-2011, 2010-2014, 2013-2017 | Census, 5-year ACS       |
| Poverty and welfare assistance                                                                                   |                                                            |                                                  |                          |
|                                                                                                                  | Families below poverty level, %                            | 2000, 2005-2009, 2007-2011, 2010-2014, 2013-2017 | Census, 5-year ACS, AHRF |
|                                                                                                                  | Population below 150% of poverty threshold, %              | 2000, 2005-2009, 2007-2011, 2010-2014, 2013-2017 | Census, 5-year ACS       |
|                                                                                                                  | Single-parent households with children aged < 18, %        | 2000, 2005-2009, 2007-2011, 2010-2014, 2013-2017 | Census, 5-year ACS       |
|                                                                                                                  | Households receiving supplemental security income, %       | 2000, 2005-2009, 2007-2011, 2010-2014, 2013-2017 | Census, 5-year ACS       |
|                                                                                                                  | Households receiving public assistance income, %           | 2000, 2005-2009, 2007-2011, 2010-2014, 2013-2017 | Census, 5-year ACS       |
| Housing tenure and quality                                                                                       |                                                            |                                                  |                          |
|                                                                                                                  | Owner-occupied housing units, %                            | 2000, 2005-2009, 2007-2011, 2010-2014, 2013-2017 | Census, 5-year ACS       |
|                                                                                                                  | Households without a motor vehicle, %                      | 2000, 2005-2009, 2007-2011, 2010-2014, 2013-2017 | Census, 5-year ACS       |

|                                                                                                            |                                                                                                                                 |                                                  |                    |
|------------------------------------------------------------------------------------------------------------|---------------------------------------------------------------------------------------------------------------------------------|--------------------------------------------------|--------------------|
|                                                                                                            | Households without a telephone, %                                                                                               | 2000, 2005-2009, 2007-2011, 2010-2014, 2013-2017 | Census, 5-year ACS |
|                                                                                                            | Occupied housing units without complete plumbing, %                                                                             | 2000, 2005-2009, 2007-2011, 2010-2014, 2013-2017 | Census, 5-year ACS |
|                                                                                                            | Households with more than 1 person per room, %                                                                                  | 2000, 2005-2009, 2007-2011, 2010-2014, 2013-2017 | Census, 5-year ACS |
|                                                                                                            | Median number of rooms per housing unit                                                                                         | 2000, 2005-2009, 2007-2011, 2010-2014, 2013-2017 | Census, 5-year ACS |
|                                                                                                            | Housing units with 4 or more bedrooms, %                                                                                        | 2000, 2005-2009, 2007-2011, 2010-2014, 2013-2017 | Census, 5-year ACS |
| <b>Social Fragmentation</b><br>(4 variables combined into single index using principal component analysis) |                                                                                                                                 |                                                  |                    |
|                                                                                                            | Residents not in the same house 1 year ago, %                                                                                   | 2000, 2005-2009, 2007-2011, 2010-2014, 2013-2017 | Census, 5-year ACS |
|                                                                                                            | Single person households, %                                                                                                     | 2000, 2005-2009, 2007-2011, 2010-2014, 2013-2017 | Census, 5-year ACS |
|                                                                                                            | Unmarried residents (includes single, separated, and divorced), %                                                               | 2000, 2005-2009, 2007-2011, 2010-2014, 2013-2017 | Census, 5-year ACS |
|                                                                                                            | Renter-occupied housing units, %                                                                                                | 2000, 2005-2009, 2007-2011, 2010-2014, 2013-2017 | Census, 5-year ACS |
| <b>Social Capital</b><br>(9 variables combined into single index using principal component analysis)       |                                                                                                                                 |                                                  |                    |
|                                                                                                            | Charities (foundations and public charities) per 100,000 persons                                                                | 1999-2015                                        | NCCS               |
|                                                                                                            | Arts and nature facilities (libraries, museums, historical sites, zoos and botanical gardens, nature parks) per 100,000 persons | 1999-2016                                        | CBP                |
|                                                                                                            | Beauty facilities (barbers, beauty salon, nail salon) per 100,000 persons                                                       | 1999-2016                                        | CBP                |
|                                                                                                            | Agents (promoters, agents, managers) per 100,000 persons                                                                        | 1999-2016                                        | CBP                |
|                                                                                                            | Spectator sports (racetracks, sports clubs, other spectator sports) per 100,000 persons                                         | 1999-2016                                        | CBP                |
|                                                                                                            | Recreation sites (public golf courses, physical fitness facilities, bowling centers, skiing, marinas) per 100,000 persons       | 1999-2016                                        | CBP                |
|                                                                                                            | Business and political organizations (business associations, professional, labor, and                                           | 1999-2016                                        | CBP                |

|                                                                              |                                                                                           |                 |                           |
|------------------------------------------------------------------------------|-------------------------------------------------------------------------------------------|-----------------|---------------------------|
|                                                                              | political organizations)<br>per 100,000 persons                                           |                 |                           |
|                                                                              | Civic and social<br>associations per 100,000<br>persons                                   | 1999-2016       | CBP                       |
|                                                                              | Religious organizations<br>per 100,000 persons                                            | 1999-2016       | CBP                       |
| <b>Health Providers/Services</b>                                             |                                                                                           |                 |                           |
|                                                                              | Number of psychiatrists<br>per 100,000 persons                                            | 1999-2016       | AHRF                      |
|                                                                              | Number of primary care<br>physicians/general and<br>family doctors per<br>100,000 persons | 1999-2016       | AHRF                      |
|                                                                              | Individuals without health<br>insurance between ages<br>18 and 64, %                      | 2000, 2005-2016 | AHRF                      |
| <b>Firearms</b><br>(5 variables summed and averaged per 100,000 individuals) |                                                                                           |                 |                           |
|                                                                              | NAICS code 45111001:<br>Ammunition                                                        | 1999-2016       | US Historical<br>Business |
|                                                                              | NAICS code 45111002:<br>Ammunition reloading<br>equipment and supplies                    | 1999-2016       | US Historical<br>Business |
|                                                                              | NAICS code 45111023:<br>Guns and gunsmiths                                                | 1999-2016       | US Historical<br>Business |
|                                                                              | NAICS code 45111024:<br>Gunsights, scopes, and<br>mounts                                  | 1999-2016       | US Historical<br>Business |
|                                                                              | NAICS code 45111076:<br>Black powder guns and<br>supplies                                 | 1999-2016       | US Historical<br>Business |
| <b>Alcohol</b><br>(9 variables summed and averaged per 100,000 individuals)  |                                                                                           |                 |                           |
|                                                                              | NAICS code 72241001:<br>Bars                                                              | 1999-2016       | US Historical<br>Business |
|                                                                              | NAICS code 72241002:<br>Cabarets                                                          | 1999-2016       | US Historical<br>Business |
|                                                                              | NAICS code 72241003:<br>Cocktail lounges                                                  | 1999-2016       | US Historical<br>Business |
|                                                                              | NAICS code 72241004:<br>Comedy Clubs                                                      | 1999-2016       | US Historical<br>Business |
|                                                                              | NAICS code 72241005:<br>Discotheques                                                      | 1999-2016       | US Historical<br>Business |
|                                                                              | NAICS code 72241006:<br>Nightclubs                                                        | 1999-2016       | US Historical<br>Business |
|                                                                              | NAICS code 72241007:<br>Nightclubs Information<br>Service                                 | 1999-2016       | US Historical<br>Business |
|                                                                              | NAICS code 72241008:<br>Pubs                                                              | 1999-2016       | US Historical<br>Business |
|                                                                              | NAICS code 72241009:<br>Karaoke Clubs                                                     | 1999-2016       | US Historical<br>Business |

|                          |                               |                                                     |                        |
|--------------------------|-------------------------------|-----------------------------------------------------|------------------------|
| <b>Veterans</b>          |                               |                                                     |                        |
|                          | Percent of veterans           | 1999-2016                                           | AHRF                   |
| <b>Control Variables</b> |                               |                                                     |                        |
|                          | Median age                    | 2000, 2005-2009, 2007-2011,<br>2010-2014, 2013-2017 | Census, 5-<br>year ACS |
|                          | Percent male                  | 1999-2016                                           | AHRF                   |
|                          | Percent non-Hispanic<br>white | 1999-2016                                           | AHRF                   |

Note. ACS = American Community Survey, CBP = County Business Patterns, AHRF = Area Health Resource File, NAICS = North American Industry Classification System, NCCS = National Center of Charitable Statistics

**eTable 4. Median and Interquartile Range of County-Level Suicide Rates Over Time by Rural-Urban Continuum**

|                                 | <b>1999-2001</b>    | <b>2002-2004</b>    | <b>2005-2007</b>    | <b>2008-2010</b>    | <b>2011-2013</b>    | <b>2014-2016</b>    |
|---------------------------------|---------------------|---------------------|---------------------|---------------------|---------------------|---------------------|
| <b>Suicide Rates</b>            |                     |                     |                     |                     |                     |                     |
| Overall, per 100,000            | 14.95 (9.83-20.56)  | 15.95 (10.96-22.13) | 16.47 (11.42-22.83) | 17.95 (12.73-24.49) | 19.55 (13.87-26.99) | 21.21 (14.76-28.48) |
| Large metropolitan, per 100,000 | 13.21 (9.97-16.69)  | 14.12 (10.86-18.31) | 14.67 (11.86-18.86) | 16.15 (13.02-20.05) | 16.97 (13.32-21.53) | 17.63 (14.10-22.98) |
| Small metropolitan, per 100,000 | 14.88 (11.05-18.36) | 15.64 (12.35-20.08) | 16.86 (13.21-21.51) | 17.89 (13.72-22.43) | 19.36 (15.24-24.59) | 20.06 (16.26-26.47) |
| Micropolitan, per 100,000       | 15.95 (10.85-21.29) | 17.04 (12.03-23.27) | 17.28 (11.97-23.50) | 19.01 (13.62-25.24) | 20.94 (14.77-27.94) | 22.60 (16.14-29.13) |
| Rural, per 100,000              | 14.52 (0.00-25.67)  | 14.33 (0.00-26.37)  | 15.41 (0.00-28.12)  | 17.45 (4.97-31.62)  | 20.18 (6.94-34.15)  | 22.05 (7.03-37.00)  |



**eTable 5. Summary of Contextual Variables by Time Period, Reported by County**

|                                                            | <b>1999-2001<br/>(N=3,137)</b> | <b>2002-2004<br/>(N=3,138)</b> | <b>2005-2007<br/>(N=3,138)</b> | <b>2008-2010<br/>(N=3,138)</b> | <b>2011-2013<br/>(N=3,138)</b> | <b>2014-2016<br/>(N=3,138)</b> |
|------------------------------------------------------------|--------------------------------|--------------------------------|--------------------------------|--------------------------------|--------------------------------|--------------------------------|
| <b>Contextual Variables</b>                                |                                |                                |                                |                                |                                |                                |
| Median age, median (IQR)                                   | 37.4 (35.2-39.7)               | 37.4 (35.2-39.7)               | 39.4 (36.6-42.5)               | 40.1 (37.3-43.1)               | 40.7 (37.6-43.7)               | 41.2 (37.9-44.2)               |
| Percent non-Hispanic white, median (IQR)                   | 89.3 (71.5-96.0)               | 88.7 (70.4-95.7)               | 87.6 (69.1-95.1)               | 86.4 (67.6-94.3)               | 85.1 (66.2-93.6)               | 84.2 (65.1-92.9)               |
| Percent male, median (IQR)                                 | 49.2 (48.5-50.0)               | 49.3 (48.7-50.1)               | 49.4 (48.7-50.2)               | 49.5 (48.8-50.2)               | 49.6 (48.9-50.5)               | 49.6 (49.0-50.5)               |
| <b>RUCC</b>                                                |                                |                                |                                |                                |                                |                                |
| Large metropolitan, n (%)                                  | 413 (13.2)                     | 414 (13.2)                     | 414 (13.2)                     | 432 (13.8)                     | 432 (13.8)                     | 432 (13.8)                     |
| Small metropolitan, n (%)                                  | 675 (21.5)                     | 675 (21.5)                     | 675 (21.5)                     | 734 (23.4)                     | 734 (23.4)                     | 734 (23.4)                     |
| Micropolitan, n (%)                                        | 1380 (44.0)                    | 1380 (44.0)                    | 1380 (44.0)                    | 1332 (42.5)                    | 1332 (42.5)                    | 1332 (42.5)                    |
| Rural, n (%)                                               | 669(21.3)                      | 669 (21.3)                     | 669 (21.3)                     | 640 (20.4)                     | 640 (20.4)                     | 640 (20.4)                     |
| <b>Deprivation quartiles</b>                               |                                |                                |                                |                                |                                |                                |
| 1 <sup>st</sup> quartile (low), n (%)                      | 339 (10.8)                     | 340 (10.8)                     | 877 (28.0)                     | 975 (31.1)                     | 985 (31.4)                     | 1194 (38.1)                    |
| 2 <sup>nd</sup> quartile, n (%)                            | 722 (23.0)                     | 722 (23.0)                     | 833 (26.6)                     | 823 (26.2)                     | 795 (25.3)                     | 812 (25.9)                     |
| 3 <sup>rd</sup> quartile, n (%)                            | 881 (28.1)                     | 881 (28.1)                     | 728 (23.2)                     | 739 (23.6)                     | 763 (24.3)                     | 710 (22.6)                     |
| 4 <sup>th</sup> quartile (high), n (%)                     | 1195 (38.1)                    | 1195 (38.1)                    | 700 (22.3)                     | 601 (19.2)                     | 595 (19.0)                     | 422 (13.5)                     |
| <b>Social Fragmentation quartiles</b>                      |                                |                                |                                |                                |                                |                                |
| 1 <sup>st</sup> quartile (low), n (%)                      | 1488 (47.4)                    | 1488 (47.4)                    | 541 (17.2)                     | 527 (16.8)                     | 354 (11.3)                     | 309 (9.9)                      |
| 2 <sup>nd</sup> quartile, n (%)                            | 831 (26.5)                     | 831 (26.5)                     | 810 (25.8)                     | 802 (25.6)                     | 734 (23.4)                     | 701 (22.3)                     |
| 3 <sup>rd</sup> quartile, n (%)                            | 486 (15.5)                     | 487 (15.5)                     | 904 (28.8)                     | 898 (28.6)                     | 962 (30.7)                     | 970 (30.9)                     |
| 4 <sup>th</sup> quartile (high), n (%)                     | 332 (10.6)                     | 332 (10.6)                     | 883 (28.1)                     | 911 (29.0)                     | 1088 (34.7)                    | 1158 (36.9)                    |
| <b>Social Capital quartiles</b>                            |                                |                                |                                |                                |                                |                                |
| 1 <sup>st</sup> quartile (low), n (%)                      | 801 (25.5)                     | 787 (25.1)                     | 753 (24.0)                     | 758 (24.2)                     | 815 (26.0)                     | 794 (25.3)                     |
| 2 <sup>nd</sup> quartile, n (%)                            | 791 (25.2)                     | 764 (25.4)                     | 795 (25.3)                     | 775 (24.7)                     | 791 (25.2)                     | 795 (25.3)                     |
| 3 <sup>rd</sup> quartile, n (%)                            | 811 (25.9)                     | 813 (25.9)                     | 777 (24.8)                     | 787 (25.1)                     | 762 (24.3)                     | 755 (24.1)                     |
| 4 <sup>th</sup> quartile (high), n (%)                     | 734 (23.4)                     | 774 (24.7)                     | 813 (25.9)                     | 818 (26.1)                     | 770 (24.5)                     | 794 (25.3)                     |
| Psychiatrist ratio per 100,000 residents, median (IQR)     | .55 (0-6.04)                   | .64 (0-6.04)                   | .75 (0-6.01)                   | 0 (0-5.56)                     | 0 (0-5.30)                     | 0 (0-5.90)                     |
| Primary care physician per 100,000 residents, median (IQR) | 41.18 (27.3-58.8)              | 41.8 (27.6-60.9)               | 41.3 (26.9-59.6)               | 39.9 (25.0-58.9)               | 38.9 (24.2-57.7)               | 37.8 (22.9-57.3)               |
| Persons 18-64 without health insurance, % , median (IQR)   | 15.0 (11.8-18.6)               | 15.0 (11.8-18.6)               | 19.6 (15.5-24.3)               | 21.4 (16.8-26.0)               | 21.2 (16.5-25.7)               | 14.2 (10.0-18.9)               |
| Veterans, %, median (IQR)                                  | 13.8 (12.2-15.4)               | 13.8 (12.2-15.4)               | 11.5 (9.9-13.1)                | 11.1 (9.5-12.7)                | 10.0 (8.6-11.5)                | 8.9 (7.6-10.4)                 |

|                                                             |                 |                 |                 |                 |                 |                 |
|-------------------------------------------------------------|-----------------|-----------------|-----------------|-----------------|-----------------|-----------------|
| Gun shops per 100,000 residents, median (IQR)               | 2.9 (0-6.2)     | 2.3 (0-5.5)     | 2.0 (0-5.1)     | 1.9 (0-5.1)     | 2.6 (0-5.9)     | 3.3 (0-7.0)     |
| Drinking establishments per 100,000 residents, median (IQR) | 20.6 (6.9-41.4) | 18.2 (6.0-38.2) | 16.8 (4.9-35.7) | 16.4 (5.3-35.5) | 14.2 (4.2-31.2) | 11.7 (3.0-26.9) |

Note: RUCC = Rural Urban Continuum Code

**eTable 6. Longitudinal Random-Effects Models of Associations of Contextual Variables With Suicide Rates by Method From 1999 to 2016**

| Variables                                           | Firearm Suicides |        |       |         | All Other Suicides |        |       |         |
|-----------------------------------------------------|------------------|--------|-------|---------|--------------------|--------|-------|---------|
|                                                     | IRR              | 95% CI |       | p-value | IRR                | 95% CI |       | p-value |
| Median age <sup>1</sup>                             | 1.002            | 0.999  | 1.005 | .17     | 1.005              | 1.002  | 1.008 | .001    |
| Percent non-Hispanic white <sup>1</sup>             | 1.007            | 1.006  | 1.008 | <.001   | 1.002              | 1.001  | 1.003 | <.001   |
| Percent male <sup>1</sup>                           | 0.997            | 0.990  | 1.003 | .28     | 1.016              | 1.010  | 1.023 | <.001   |
| Social fragmentation                                |                  |        |       |         |                    |        |       |         |
| 4 <sup>th</sup> vs 1 <sup>st</sup> quartile         | 1.032            | 0.999  | 1.066 | .06     | 1.162              | 1.123  | 1.203 | <.001   |
| 3 <sup>rd</sup> vs 1 <sup>st</sup> quartile         | 1.020            | 0.994  | 1.047 | .14     | 1.130              | 1.098  | 1.163 | <.001   |
| 2 <sup>nd</sup> vs 1 <sup>st</sup> quartile         | 1.017            | 0.995  | 1.040 | .13     | 1.079              | 1.052  | 1.107 | <.001   |
| Social capital                                      |                  |        |       |         |                    |        |       |         |
| 4 <sup>th</sup> vs 1 <sup>st</sup> quartile         | 0.827            | 0.796  | 0.859 | <.001   | 1.051              | 1.010  | 1.094 | .02     |
| 3 <sup>rd</sup> vs 1 <sup>st</sup> quartile         | 0.853            | 0.827  | 0.880 | <.001   | 1.064              | 1.029  | 1.099 | <.001   |
| 2 <sup>nd</sup> vs 1 <sup>st</sup> quartile         | 0.927            | 0.904  | 0.950 | <.001   | 1.021              | 0.993  | 1.049 | .14     |
| Psychiatrist ratio, per 100,000 residents           | 0.994            | 0.993  | 0.996 | <.001   | 1.002              | 1.000  | 1.004 | .02     |
| Primary care physician ratio, per 100,000 residents | 1.000            | 1.000  | 1.001 | .17     | 1.000              | 1.000  | 1.001 | .33     |
| Percent without health insurance                    | 1.008            | 1.007  | 1.009 | <.001   | 1.002              | 1.001  | 1.004 | .002    |
| Percent veterans                                    | 1.031            | 1.027  | 1.035 | <.001   | 1.022              | 1.018  | 1.026 | <.001   |
| Drinking establishment ratio per 100,000 residents  | 1.000            | 0.999  | 1.000 | .09     | 1.001              | 1.000  | 1.001 | <.001   |
| <b>Interaction Terms</b>                            |                  |        |       |         |                    |        |       |         |
| Deprivation quartiles                               |                  |        |       |         |                    |        |       |         |
| 4 <sup>th</sup> vs 1 <sup>st</sup> quartile         |                  |        |       |         |                    |        |       |         |
| 1999-2001, Large Metro                              | 1.407            | 1.315  | 1.506 | <.001   | 1.056              | 0.988  | 1.129 | .11     |
| 1999-2001, Rural                                    | 1.594            | 1.422  | 1.786 | <.001   | 1.188              | 1.044  | 1.353 | .01     |
| 2014-2016, Large Metro                              | 1.011            | 0.930  | 1.099 | .80     | 0.919              | 0.845  | 0.999 | .05     |
| 2014-2016, Rural                                    | 1.145            | 1.025  | 1.278 | .02     | 1.034              | 0.912  | 1.173 | .60     |
| 3 <sup>rd</sup> vs 1 <sup>st</sup> quartile         |                  |        |       |         |                    |        |       |         |
| 1999-2001, Large Metro                              | 1.242            | 1.184  | 1.304 | <.001   | 1.015              | 0.966  | 1.066 | .56     |
| 1999-2001, Rural                                    | 1.279            | 1.149  | 1.425 | <.001   | 1.022              | 0.902  | 1.157 | .73     |
| 2014-2016, Large Metro                              | 1.028            | 0.971  | 1.089 | .35     | 0.936              | 0.883  | 0.991 | .02     |
| 2014-2016, Rural                                    | 1.059            | 0.954  | 1.175 | .29     | 0.942              | 0.834  | 1.065 | .34     |
| 2 <sup>nd</sup> vs 1 <sup>st</sup> quartile         |                  |        |       |         |                    |        |       |         |
| 1999-2001, Large Metro                              | 1.093            | 1.052  | 1.135 | <.001   | 1.023              | 0.985  | 1.063 | .24     |
| 1999-2001, Rural                                    | 1.127            | 1.015  | 1.252 | .02     | 0.937              | 0.827  | 1.062 | .32     |
| 2014-2016, Large Metro                              | 1.045            | 1.004  | 1.087 | .03     | 0.962              | 0.925  | 0.999 | .05     |
| 2014-2016, Rural                                    | 1.078            | 0.973  | 1.194 | .15     | 0.881              | 0.779  | 0.996 | .04     |
| Gun shops                                           |                  |        |       |         |                    |        |       |         |
| Large metro                                         | 1.033            | 1.025  | 1.042 | <.001   | 0.992              | 0.984  | 1.001 | .08     |
| Small metro                                         | 1.014            | 1.009  | 1.019 | <.001   | 1.006              | 1.000  | 1.011 | .04     |

|       |       |       |       |       |       |       |       |     |
|-------|-------|-------|-------|-------|-------|-------|-------|-----|
| Micro | 1.006 | 1.003 | 1.009 | <.001 | 1.003 | 1.000 | 1.006 | .08 |
| Rural | 1.003 | 1.000 | 1.006 | .08   | 0.997 | 0.993 | 1.002 | .20 |

<sup>†</sup>Control variables were global-mean centered, IRRs reflect 1 unit increase from average.

## **eMethods. Index Creation**

Prior to examining how contextual factors impact county-level suicide rates, individual variables that measured similar constructs were reduced to indices through principal component analysis (PCA). PCA allows for the reduction of variables while retaining much of the overall variation in the data. Linear combinations of the original variables are used to create new variables, or principal components.<sup>1,2</sup> PCA was conducted separately for the socioeconomic, social fragmentation, and social capital variables described in eTable 3. After the PCA analysis, components were examined for meaning and interpretability which resulted in only a single component from each PCA being kept for the final analyses. The area deprivation index accounted for 38.6% of variance, the social fragmentation index accounted for 47.4% of variance, and the social capital index accounted for 28.5% of variance. While somewhat low for variance explained, these factors were modeled after previously used indices and only the first factor was retained since the factor loadings were as expected for interpretation of the indices. Factor scores for the components were computed for each county and time-period of the study with a mean of 0 and standard deviation of 1. All PCA analyses were done using SAS 9.4.<sup>3</sup> Factor scores were then divided into quartiles based on the overall study, with roughly 25% of county/year categories falling into each quartile. The lowest quartile was used as a reference for all index variables.

### **Model selection**

To examine associations between suicide and contextual variables, a series of longitudinal models using maximum likelihood estimation were used. For all models examined, the outcome was the count of suicides per county. The first step of the model building process examined unconditional means and unconditional growth models to measure the variation across counties and the variation across counties and time.<sup>4</sup> Next, contextual variables were examined in association with suicides. All contextual variables were included in the final model. Interactions between contextual variables and the four category rural urban continuum codes (RUCC) variable were examined to see how the associations of contextual variables with suicide varied across the rural/urban continuum. Interactions between contextual variables and time were also examined to explore how associations with suicide change over time. Only interactions that were significant at the .05 level were maintained in the final longitudinal model.<sup>4</sup> A single three-way interaction (time\*RUCC\*deprivation) was examined based on the significant two-way interactions, but this variable was not retained in the final model because it was not significant nor did it improve model fit.

## eReferences

1. Abdi H, Williams LJ. Principal component analysis. *Wiley Interdiscip Rev Comput Stat.* 2010;2(4):433–459.
2. Jolliffe I. *Principal Component Analysis.* New York, NY: Springer Series in Statistics; 2002.
3. SAS Institute, Inc. *SAS Software.* Cary, NC: SAS, Inc; 2014.
4. Singer JD, Willett JB. *Applied Longitudinal Data Analysis: Modeling Change and Event Occurrence.* New York, NY: Oxford University Press; 2003.
